# Supplementary material for: Source of dietary fibre and diverticular disease incidence: a prospective study of UK women
Source: PubMed Central journal article supplement (PMC4145436; doi:10.1136/gutjnl-2013-304644), 2014-01-02

eTABLE 1

Characteristics of Million Women Study participants according to fifths of cereal fibre intake

| Categories of fibre intake at baseline                         | Fifths of cereal fibre intake (g/day) |               |               |               |               | All women     |
|----------------------------------------------------------------|---------------------------------------|---------------|---------------|---------------|---------------|---------------|
|                                                                | < 3.2                                 | 3.2-4.7       | 4.7-6.3       | 6.3-8.2       | ≥ 8.2         |               |
| Remeasured cereal fibre intake (g/day), mean (SD)*             | 3.3 (2.1)                             | 4.6 (2.2)     | 5.5 (2.0)     | 6.8 (2.2)     | 8.8 (2.8)     | 5.9 (3.0)     |
| Dietary fibre intake from all other sources (g/day), mean (SD) | 6.8 (3.4)                             | 7.7 (3.3)     | 8.2 (3.3)     | 8.5 (3.4)     | 8.9 (3.5)     | 8.0 (3.5)     |
| <b>Characteristics</b>                                         |                                       |               |               |               |               |               |
| Number of women                                                | 137,954                               | 138,379       | 137,617       | 138,596       | 137,529       | 690,075       |
| Mean (SD) age, years                                           | 59.7 (4.8)                            | 59.8 (4.9)    | 59.8 (4.9)    | 59.9 (4.9)    | 60.0 (5.0)    | 59.8 (4.9)    |
| Mean (SD) alcohol intake, units/week                           | 5.1 (6.6)                             | 4.8 (6.0)     | 4.6 (5.7)     | 4.5 (5.4)     | 4.2 (5.2)     | 4.6 (5.8)     |
| Mean (SD) height, cm                                           | 161.5 (6.7)                           | 162.1 (6.6)   | 162.4 (6.6)   | 162.7 (6.6)   | 163.0 (6.6)   | 162.3 (6.6)   |
| Mean (SD) body mass index, kg/m <sup>2</sup>                   | 26.3 (4.7)                            | 26.2 (4.6)    | 26.1 (4.5)    | 25.9 (4.4)    | 25.6 (4.3)    | 26.0 (4.5)    |
| Mean (SD) total energy intake, kJ                              | 6,581 (2,042)                         | 7,575 (1,975) | 7,963 (2,017) | 8,306 (2,039) | 8,796 (2,242) | 7,844 (2,197) |
| Socioeconomic status, lowest third                             | 40%                                   | 35%           | 32%           | 30%           | 29%           | 33%           |
| Current smokers                                                | 23%                                   | 15%           | 11%           | 9%            | 7%            | 13%           |
| Current use of hormone therapy for menopause                   | 29%                                   | 28%           | 28%           | 28%           | 28%           | 28%           |
| Consume red or processed meat                                  | 88%                                   | 87%           | 87%           | 86%           | 85%           | 87%           |
| <b>Follow-up</b>                                               |                                       |               |               |               |               |               |
| Women-years of follow-up (thousands)                           | 815.9                                 | 827.2         | 831.3         | 846.4         | 854.2         | 4,175         |
| New cases of diverticular disease                              | 3,783                                 | 3,657         | 3,445         | 3,278         | 3,162         | 17,325        |

\*Based on dietary intake in a random sample of 4265 women reported 21 (SD 14) months after baseline.

eTABLE 2

## Characteristics of Million Women Study participants according to fifths of fruit fibre intake

| Categories of fibre intake at baseline                         | Fifths of fruit fibre intake (g/day) |               |               |               |               | Overall       |
|----------------------------------------------------------------|--------------------------------------|---------------|---------------|---------------|---------------|---------------|
|                                                                | < 1.2                                | 1.2-2.0       | 2.0-3.0       | 3.0-4.5       | ≥ 4.5         |               |
| Remeasured fruit fibre intake (g/day), mean (SD)*              | 1.2 (1.0)                            | 2.1 (1.5)     | 2.9 (1.8)     | 3.7 (1.8)     | 5.5 (2.7)     | 3.1 (2.3)     |
| Dietary fibre intake from all other sources (g/day), mean (SD) | 8.9 (3.5)                            | 10.3 (3.4)    | 11.1 (3.5)    | 11.6 (3.5)    | 12.2 (3.9)    | 10.8 (3.8)    |
| <b>Characteristics</b>                                         |                                      |               |               |               |               |               |
| Number of women                                                | 138,529                              | 138,084       | 137,945       | 137,679       | 137,838       | 690,075       |
| Mean (SD) age, years                                           | 59.8 (5.0)                           | 60.0 (5.0)    | 59.9 (4.9)    | 59.8 (4.9)    | 59.7 (4.8)    | 59.8 (4.9)    |
| Mean (SD) alcohol intake, units/week                           | 4.7 (6.5)                            | 4.5 (5.8)     | 4.7 (5.6)     | 4.7 (5.5)     | 4.5 (5.6)     | 4.6 (5.8)     |
| Mean (SD) height, cm                                           | 161.5 (6.8)                          | 162.0 (6.6)   | 162.5 (6.6)   | 162.7 (6.5)   | 163.0 (6.6)   | 162.3 (6.6)   |
| Mean (SD) body mass index, kg/m <sup>2</sup>                   | 26.2 (4.7)                           | 26.2 (4.5)    | 26.1 (4.4)    | 25.9 (4.4)    | 25.7 (4.4)    | 26.0 (4.5)    |
| Mean (SD) total energy intake, kJ                              | 7,120 (2,328)                        | 7,733 (2,152) | 7,972 (2,104) | 8,092 (2,048) | 8,306 (2,149) | 7,844 (2,197) |
| Socioeconomic status, lowest third                             | 43%                                  | 35%           | 31%           | 29%           | 29%           | 33%           |
| Current smokers                                                | 27%                                  | 15%           | 10%           | 7%            | 6%            | 13%           |
| Current use of hormone therapy for menopause                   | 29%                                  | 28%           | 28%           | 28%           | 27%           | 28%           |
| Consume red or processed meat                                  | 89%                                  | 89%           | 88%           | 86%           | 81%           | 87%           |
| <b>Follow-up</b>                                               |                                      |               |               |               |               |               |
| Women-years of follow-up (thousands)                           | 828.9                                | 837.9         | 839.2         | 837.4         | 831.7         | 4,175         |
| New cases of diverticular disease                              | 4,144                                | 3,638         | 3,437         | 3,209         | 2,897         | 17,325        |

\*Based on dietary intake in a random sample of 4265 women reported 21 (SD 14) months after baseline.

eTABLE 3

Characteristics of Million Women Study participants according to fifths of vegetable (not potato) fibre intake

| Categories of fibre intake at baseline                         | Fifths of vegetable fibre intake (g/day) |               |               |               |               | Overall       |
|----------------------------------------------------------------|------------------------------------------|---------------|---------------|---------------|---------------|---------------|
|                                                                | < 1.5                                    | 1.5-2.0       | 2.0-2.6       | 2.6-3.5       | ≥ 3.5         |               |
| Remeasured vegetable fibre intake (g/day), mean (SD)*          | 1.5 (1.0)                                | 2.1 (1.2)     | 2.5 (1.3)     | 2.9 (1.3)     | 4.0 (2.2)     | 2.5 (1.6)     |
| Dietary fibre intake from all other sources (g/day), mean (SD) | 9.1 (4.0)                                | 10.5 (3.8)    | 11.3 (3.8)    | 12.0 (3.9)    | 12.9 (4.4)    | 11.1 (4.2)    |
| <b>Characteristics</b>                                         |                                          |               |               |               |               |               |
| Number of women                                                | 139,731                                  | 138,737       | 136,281       | 137,395       | 137,931       | 690075        |
| Mean (SD) age, years                                           | 59.7 (5.0)                               | 59.8 (5.0)    | 59.9 (4.9)    | 60.1 (4.9)    | 59.7 (4.8)    | 59.8 (4.9)    |
| Mean (SD) alcohol intake, units/week                           | 3.8 (5.4)                                | 4.4 (5.5)     | 4.7 (5.7)     | 5.0 (5.9)     | 5.3 (6.4)     | 4.6 (5.8)     |
| Mean (SD) height, cm                                           | 161.6 (6.7)                              | 162.1 (6.6)   | 162.3 (6.6)   | 162.7 (6.6)   | 162.9 (6.6)   | 162.3 (6.6)   |
| Mean (SD) body mass index, kg/m <sup>2</sup>                   | 26.1 (4.6)                               | 26.0 (4.5)    | 26.0 (4.4)    | 26.0 (4.4)    | 26.0 (4.5)    | 26.0 (4.5)    |
| Mean (SD) total energy intake, kJ                              | 6,759 (2,118)                            | 7,581 (2,009) | 7,983 (2,038) | 8,268 (2,066) | 8,647 (2,253) | 7,844 (2,197) |
| Socioeconomic status, lowest third                             | 41%                                      | 35%           | 32%           | 29%           | 29%           | 33%           |
| Current smokers                                                | 19%                                      | 15%           | 12%           | 10%           | 9%            | 13%           |
| Current use of hormone therapy for menopause                   | 29%                                      | 29%           | 27%           | 27%           | 28%           | 28%           |
| Consume red or processed meat                                  | 82%                                      | 87%           | 87%           | 86%           | 83%           | 85%           |
| <b>Follow-up</b>                                               |                                          |               |               |               |               |               |
| Women-years of follow-up (thousands)                           | 859.8                                    | 849.5         | 825.7         | 818.9         | 821.1         | 4,175         |
| New cases of diverticular disease                              | 3,864                                    | 3,496         | 3,451         | 3,314         | 3,200         | 17,325        |

\*Based on dietary intake in a random sample of 4265 women reported 21 (SD 14) months after baseline.

eTABLE 4

## Characteristics of Million Women Study participants according to fifths of potato fibre intake

| Categories of fibre intake at baseline               | Fifths of potato fibre intake (g/day) |               |               |               |               | Overall       |
|------------------------------------------------------|---------------------------------------|---------------|---------------|---------------|---------------|---------------|
|                                                      | < 1.3                                 | 1.3-1.9       | 1.9-2.4       | 2.4-2.9       | ≥ 2.9         |               |
| Remeasured potato fibre intake (g/day), mean (SD)*   | 1.2 (0.9)                             | 1.9 (0.7)     | 2.3 (0.7)     | 2.6 (0.7)     | 3.1 (0.9)     | 2.3 (1.0)     |
| Mean (SD) fibre intake from all other sources, g/day | 11.8 (5.3)                            | 11.8 (4.7)    | 12.0 (4.6)    | 11.5 (4.6)    | 11.3 (4.8)    | 11.7 (4.8)    |
| <b>Characteristics</b>                               |                                       |               |               |               |               |               |
| Number of women                                      | 175,691                               | 133,651       | 128,590       | 118,793       | 133,350       | 690,075       |
| Mean (SD) age, years                                 | 59.6 (4.9)                            | 59.5 (4.9)    | 60.0 (4.9)    | 60.1 (4.9)    | 60.2 (5.0)    | 59.8 (4.9)    |
| Mean (SD) alcohol intake, units/week                 | 4.8 (5.9)                             | 4.8 (5.7)     | 4.8 (5.8)     | 4.5 (5.7)     | 4.2 (5.8)     | 4.6 (5.8)     |
| Mean (SD) height, cm                                 | 162.3 (6.7)                           | 162.3 (6.6)   | 162.5 (6.6)   | 162.3 (6.6)   | 162.3 (6.7)   | 162.3 (6.6)   |
| Mean (SD) body mass index, kg/m <sup>2</sup>         | 25.9 (4.5)                            | 26.1 (4.5)    | 26.0 (4.4)    | 26.0 (4.4)    | 26.2 (4.6)    | 26.0 (4.5)    |
| Mean (SD) total energy intake, kJ                    | 6,649 (2,000)                         | 7,546 (1,896) | 8,014 (1,910) | 8,412 (2,004) | 9,046 (2,295) | 7,844 (2,197) |
| Socioeconomic status, lowest third                   | 34%                                   | 33%           | 31%           | 33%           | 35%           | 33%           |
| Current smokers                                      | 12%                                   | 12%           | 11%           | 14%           | 16%           | 13%           |
| Current use of hormone therapy for menopause         | 28%                                   | 29%           | 28%           | 28%           | 27%           | 28%           |
| Consume red or processed meat                        | 77%                                   | 86%           | 90%           | 92%           | 93%           | 87%           |
| <b>Follow-up</b>                                     |                                       |               |               |               |               |               |
| Women-years of follow-up (thousands)                 | 1,026.0                               | 793.7         | 776.1         | 732.6         | 846.7         | 4,175         |
| New cases of diverticular disease                    | 3,896                                 | 3,088         | 3,189         | 3,182         | 3,970         | 17,325        |

\*Based on dietary intake in a random sample of 4265 women reported 21 (SD 14) months after baseline.

eTABLE 5

Relative risk of hospital admission or death from diverticular disease in the Million Women Study by fifths of the source of dietary fibre intake further adjusted for all other fibre types.

|                           | Relative risks (RRs) and 95% group-specific CIs (G-S CIs) <sup>*</sup> by fifths of dietary fibre intake |                  |                  |                  |                  |
|---------------------------|----------------------------------------------------------------------------------------------------------|------------------|------------------|------------------|------------------|
|                           | Lowest                                                                                                   | 2                | 3                | 4                | Highest          |
| Cereal fibre <sup>†</sup> | 1.00 (0.97-1.04)                                                                                         | 0.98 (0.95-1.01) | 0.93 (0.90-0.96) | 0.89 (0.86-0.92) | 0.83 (0.81-0.87) |
| Fruit fibre               | 1.00 (0.97-1.04)                                                                                         | 0.91 (0.88-0.94) | 0.91 (0.88-0.94) | 0.88 (0.85-0.91) | 0.82 (0.79-0.85) |
| Vegetable fibre           | 1.00 (0.97-1.04)                                                                                         | 0.96 (0.93-0.99) | 1.00 (0.96-1.03) | 0.99 (0.96-1.03) | 1.00 (0.96-1.04) |
| Potato fibre              | 1.00 (0.97-1.04)                                                                                         | 1.01 (0.97-1.04) | 1.04 (1.00-1.07) | 1.04 (1.01-1.08) | 1.08 (1.04-1.11) |

<sup>\*</sup>Stratified by region and adjusted for age, socioeconomic status, smoking, alcohol, body mass index, height, current use of hormone therapy for menopause, total energy intake, and type of meat consumed.

<sup>†</sup>See e-tables 1-4 for cut-off values, mean remeasured values and numbers of cases for each category for specific sources of dietary fibre intake

eTABLE 6

Relative risk of hospital admission or death from diverticular disease in the Million Women Study by type of meat.

|                                                                        | Type of meat consumed at least once per week |                           |                  | <i>P</i> |
|------------------------------------------------------------------------|----------------------------------------------|---------------------------|------------------|----------|
|                                                                        | No meat                                      | White meat (poultry) only | Red meat*        |          |
| Number of women                                                        | 21,361                                       | 69,474                    | 593,782          |          |
| Diverticular disease cases                                             | 393                                          | 1,510                     | 15,296           |          |
| Relative risks (RRs) and 95% group-specific CIs (G-S CIs) <sup>†</sup> | 1.00 (0.91-1.10)                             | 1.07 (1.01-1.12)          | 1.10 (1.08-1.13) | 0.096    |

\*Includes red (beef, lamb, pork, offal) or processed (bacon, ham, sausages, beef burgers/hamburgers) meat.

<sup>†</sup>Stratified by region and adjusted for age, socioeconomic status, smoking, alcohol, body mass index, height, current hormone therapy for menopause use, total energy intake, and dietary fibre intake.

**eFigure 1. Relative risk (95% CI) of diverticular disease per g/day potato fibre intake by chosen characteristics.**

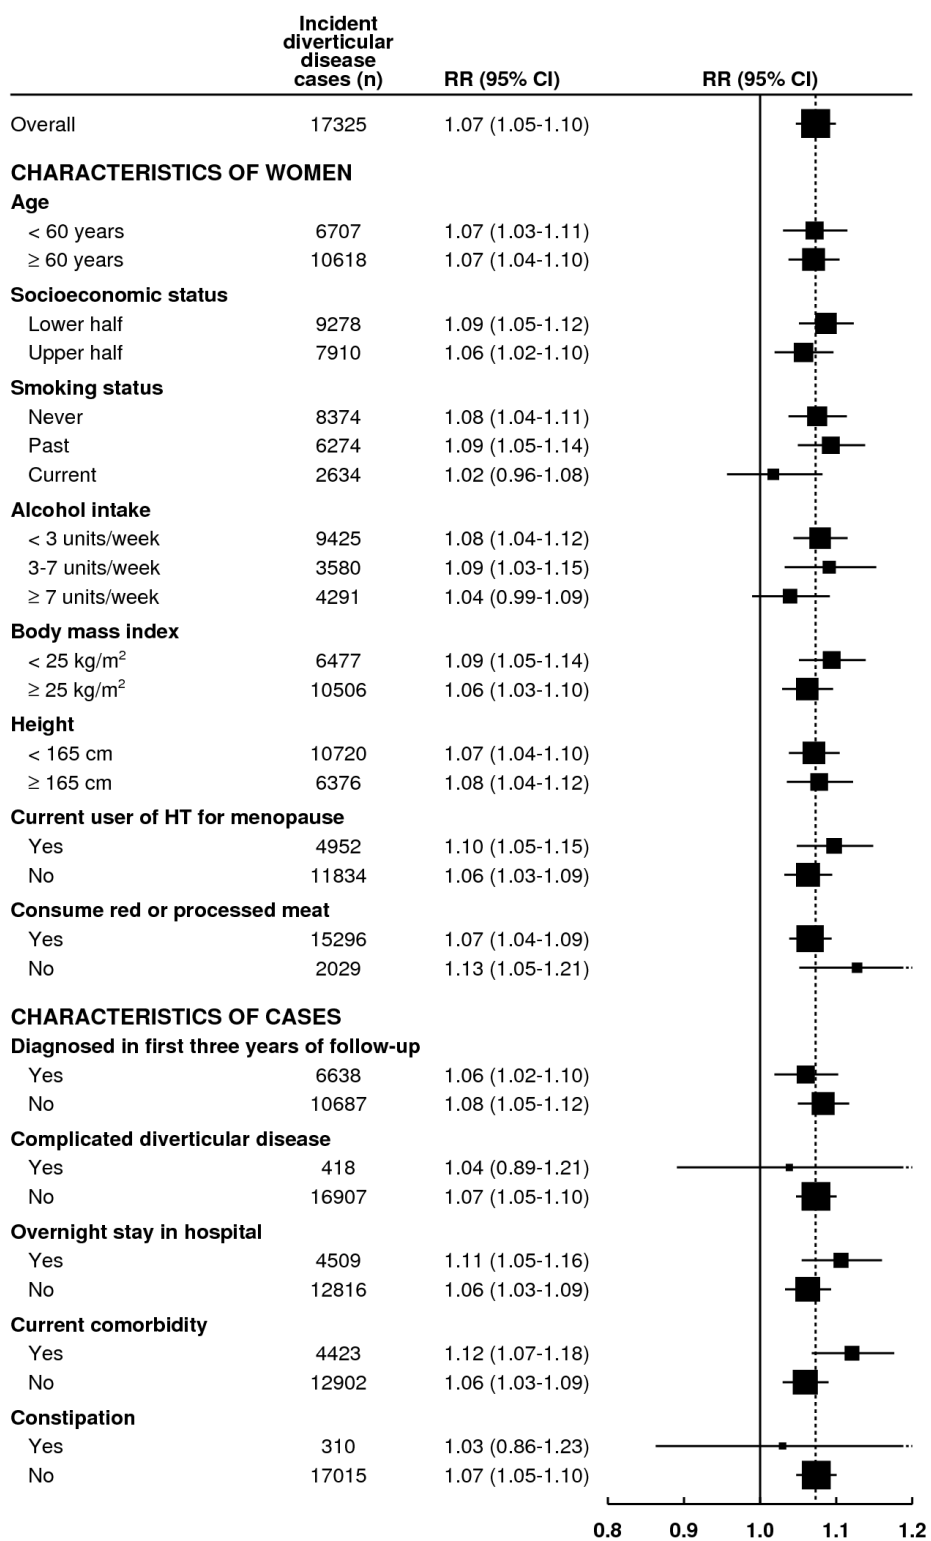

Supplement: gutjnl-2013-304644-s1.pdf [file gutjnl-2013-304644-s1.pdf]
